# Supplementary material for: A pH controlled temperature response reprogramming hydrogel for monitoring human electrophysiological signals
Source: Royal Society of Chemistry journal article supplement (doi:10.1039/d0tb01769h), 2021-01-01
Supplement: d0tb01769h1.pdf [file d0tb01769h1.pdf]

## Supporting information

### **PH controlled temperature response reprogramming hydrogel for monitoring human electrophysiological signals**

**Zihang Shen<sup>b,c</sup>, Kaiyue Liu<sup>b,c</sup>, Zheng Zhou<sup>b,c\*</sup>, Qifang Li<sup>a,b,c\*</sup>**

*a State Key Laboratory of Chemical Resource Engineering, Beijing University of Chemical Technology, Beijing 100029, People's Republic of China*

*b Key Laboratory of Carbon Fiber and Functional Polymers, Ministry of Education, Beijing University of Chemical Technology, Beijing 100029, People's Republic of China*

*c College of Material Science and Engineering, Beijing University of Chemical Technology, Beijing 100029, People's Republic of China*

---

\*Corresponding author: [qflee@mail.buct.edu.cn](mailto:qflee@mail.buct.edu.cn) (Qifang Li). FAX: +86-010-64435451;

\*Corresponding author: [zhouzheng@mail.buct.edu.cn](mailto:zhouzheng@mail.buct.edu.cn) (Zheng Zhou). FAX: +86-010-64435451;

## 1. The formulation of hydrogel.

**Table.S1** The formulation of hydrogel.

|                                     | AUA  |       | AM   |        | NaOH  | MBAA | H <sub>2</sub> O | KPS     |
|-------------------------------------|------|-------|------|--------|-------|------|------------------|---------|
| AUA <sub>0</sub> -AM <sub>100</sub> | 0M   | 0g    | 2M   | 1.42g  | 0g    | 5mg  | 10ml             | 0.0275g |
| AUA <sub>20</sub> -AM <sub>80</sub> | 0.4M | 1.02g | 1.6M | 1.13g  | 0.16g | 5mg  | 10ml             | 0.0275g |
| AUA <sub>40</sub> -AM <sub>60</sub> | 0.8M | 2.04g | 1.2M | 0.852g | 0.32g | 5mg  | 10ml             | 0.0275g |
| AUA <sub>50</sub> -AM <sub>50</sub> | 1M   | 2.55g | 1M   | 0.71g  | 0.4g  | 5mg  | 10ml             | 0.0275g |
| AUA <sub>60</sub> -AM <sub>40</sub> | 1.2M | 3.06g | 0.8  | 0.568g | 0.48g | 5mg  | 10ml             | 0.0275g |
| AUA <sub>80</sub> -AM <sub>20</sub> | 1.6M | 4.08g | 0.4  | 0.284g | 0.64g | 5mg  | 10ml             | 0.0275g |
| AUA <sub>100</sub> -AM <sub>0</sub> | 2M   | 5.10g | 0    | 0g     | 0.8g  | 5mg  | 10ml             | 0.0275g |

## 2. Test Methods

### 2.1 <sup>1</sup>HNMR test:

<sup>1</sup>HNMR spectra was recorded on a Bruker AV 11 – 400 spectrometer at 400 MHz in CF<sub>3</sub>COOD at room temperature.

### 2.2 FT-IR test:

Fourier transform infrared (FTIR) spectra of the hydrogel were recorded on a Bruker Tensor 27(Bruker Optics Inc.).

### 2.3 Water contact angle test:

The surface of the hydrogel soaked in the HCl solution was wiped dry, and the water contact angle test was performed with Dataphysics OCA-20.

### 2.4 scanning electron microscope(SEM) test:

After the hydrogel was freeze-dried, it was brittle in liquid nitrogen. Tested with Hitachi S-4700 instrument. Spray gold on the surface of the sample to improve conductivity.

### 2.5 Electrocardiogram test:

The ECG test (SynAmp II, NeuroScan Compumedics, USA) was performed with the filter range set to 50 Hz. The hydrogel was prepared into a cuboid of 3mm\*3mm\*1mm.

### 3.Results and Discussion

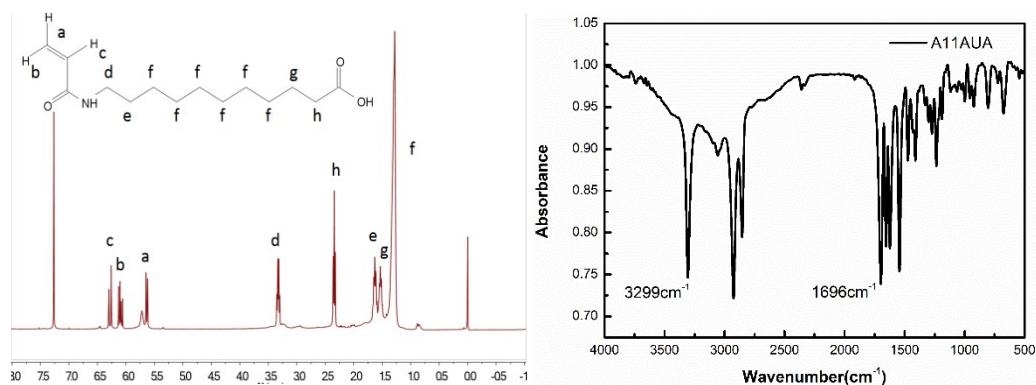

**Fig.S1** <sup>1</sup>H NMR and FT-IR of A11AUA

Fig.S1 is the FT-IR spectrum and <sup>1</sup>H NMR of A11AUA synthesized by 11-aminoundecanoic acid and acryloyl chloride. Among them, the appearance of the characteristic peaks at 3303cm<sup>-1</sup> and 1696cm<sup>-1</sup> of A11AUA of the infrared spectrum corresponds to the tensile vibration of C = C and C = O, respectively.

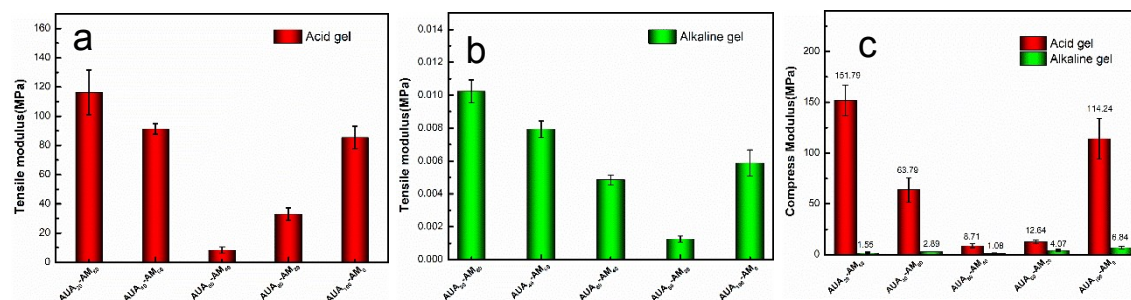

**Fig.S2** Tensile and compressive modulus of acid gel and alkaline gel;(a) Tensile modulus of acid gel; (b) Tensile modulus of alkaline gel; (c) Comparison of Compression modulus of acid gel and alkaline gel.

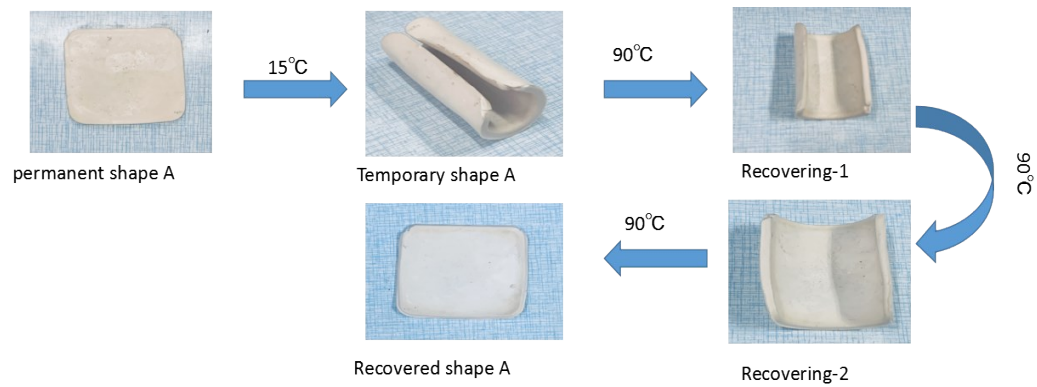

**Fig.S3** Photograph of acid gel shape memory

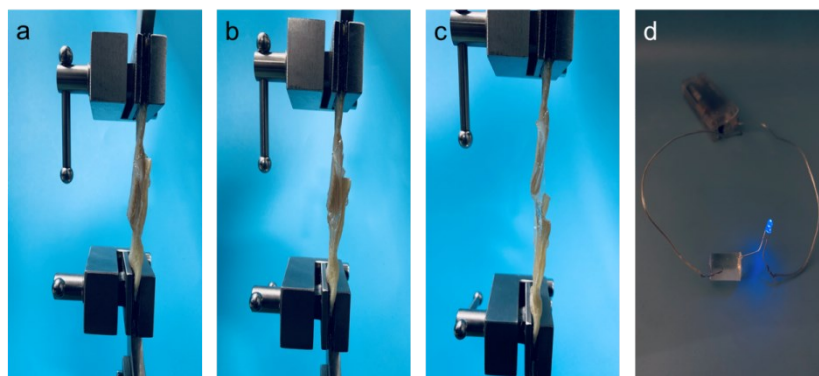

**Fig.S4** (a-c) Hydrogel adhesion test process; (d) Hydrogel can light the bulb at 3V
